# Supplementary material
Source: PubMed Central journal article supplement (PMC2653988)

# Supplemental Figure S1

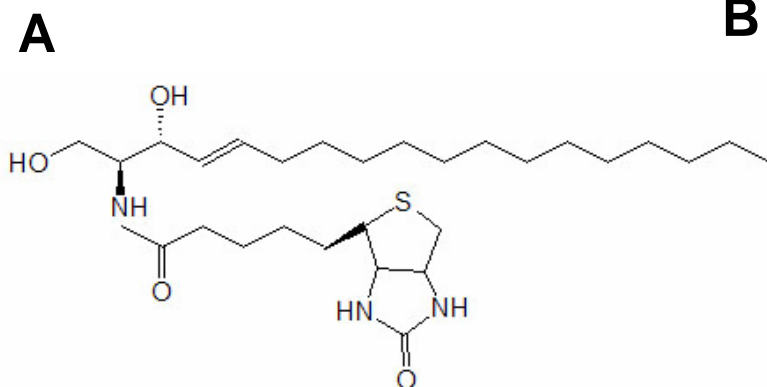

**B**

| Peptide Sequence    | Peptide Calculated Mass | Peptide Observed Mass | Residues  | Sequence Identity |
|---------------------|-------------------------|-----------------------|-----------|-------------------|
| LRQPFQK             | 1063.6046               | 1063.3427             | 64 - 70   | I2PP2A            |
| SSQTQNKASR          | 1106.5548               | 1107.2794             | 170 - 179 | I2PP2A            |
| VEVTEFEDIK          | 1208.6045               | 1208.3035             | 110-119   | I2PP2A            |
| VEVTEFEDIKSGYR      | 1671.8224               | 1671.4127             | 110 - 123 | I2PP2A            |
| LNEQASEEILK         | 1273.6673               | 1273.3516             | 45 - 55   | I2PP2A            |
| LNEQASEEILKVEQK     | 1757.9279               | 1757.4976             | 45-59     | I2PP2A            |
| EFHNLN ESGDPSSK     | 1446.6495               | 1446.2965             | 142-154   | I2PP2A            |
| IDFYFDENPYFENK      | 1840.8064               | 1840.3547             | 124-137   | I2PP2A            |
| EQQEAI EHIDEVQNEIDR | 2195.021                | 2194.4807             | 27-44     | I2PP2A            |
| SGYRIDFYFDENPYFENK  | 2304.0242               | 2303.4619             | 120 - 137 | I2PP2A            |

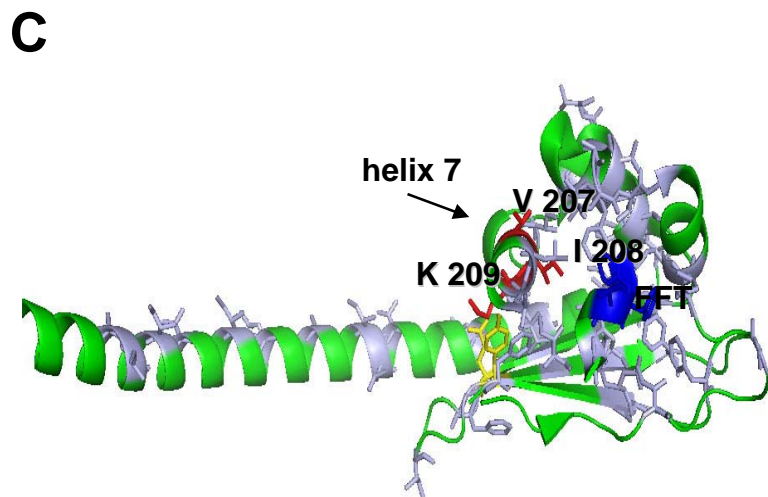

Supplement: fj.08-120550_1.pdf [file fj.08-120550_1.pdf]
